# Supplementary material
Source: MDPI journal article supplement (https://www.mdpi.com/2076-3425/12/6/715)
Supplement: s1 [file s1]

Archive with 1 entries (1 files):
- Brain Sci. 2021, 11, 1648.pdf
